# Supplementary material
Source: publisher figshare collection journal article supplement (https://acs.figshare.com/ndownloader/files/9687127)
Supplement: Supplementary file 1 [file 9687127]

## Supporting Information

### $\pi$ -Extended Isoindigo-Based Derivative: A Promising Electron-Deficient Building Block for Polymer Semiconductors

Long Xu,<sup>1</sup> Zhiyuan Zhao,<sup>2</sup> Mingchao Xiao,<sup>1</sup> Jie Yang,<sup>1</sup> Jian Xiao,<sup>1</sup> Zhengran Yi,<sup>\*,1</sup> Shuai Wang,<sup>\*,1</sup> Yunqi Liu.<sup>\*,2</sup>

<sup>1</sup>College of Chemistry and Chemical Engineering, and Key Laboratory for Large-format Battery Materials and System, Ministry of Education, Hubei Key Laboratory of Material Chemistry and Service Failure, Huazhong University of Science and Technology, Wuhan 430074, China

<sup>2</sup>Key Laboratory of Organic Solids, Beijing National Laboratory for Molecular Sciences, Institute of Chemistry, Chinese Academy of Sciences, Beijing 100190, China

\*Corresponding Author: yzr@whu.edu.cn; chmsamuel@hust.edu.cn; liuyq@iccas.ac.cn

#### Contents:

1. GPC chromatograms of **PIVI2T** and **PF<sub>4</sub>IVI2T** using 1,2,4-trichlorobenzene as an eluent at 150 °C. Figure S1
2. TGA plot of **PIVI2T** and **PF<sub>4</sub>IVI2T**. Figure S2
3. DSC curves of **PIVI2T** and **PF<sub>4</sub>IVI2T**. Figure S3
4. Output and transfer characteristics of **PIVI2T** annealed at 160 °C. Figure S4
5. OTFT Performance of **PIVI2T** and **PF<sub>4</sub>IVI2T**. Table S1.
6. <sup>1</sup>H NMR spectra of compound **2a**, **2b**, **3a**, **3b**, **4a** and **4b**. Figure S5–S10.
7. <sup>13</sup>C NMR spectra of compound **2a**, **2b**, **3a**, **3b**, **4a** and **4b**. Figure S11–S16.
8. Mass spectra of compound **2a**, **2b**, **3a**, **3b**, **4a** and **4b**. Figure S17–S22.

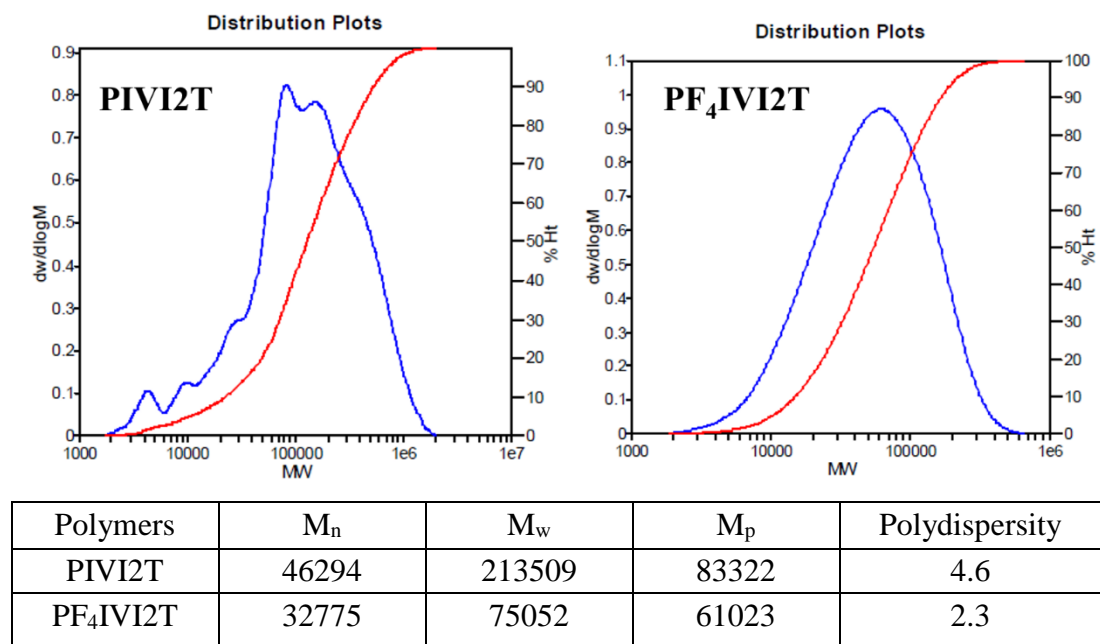

**Figure S1.** GPC chromatograms of **PIVI2T** and **PF<sub>4</sub>IVI2T** using 1,2,4-trichlorobenzene as an eluent at 150 °C.

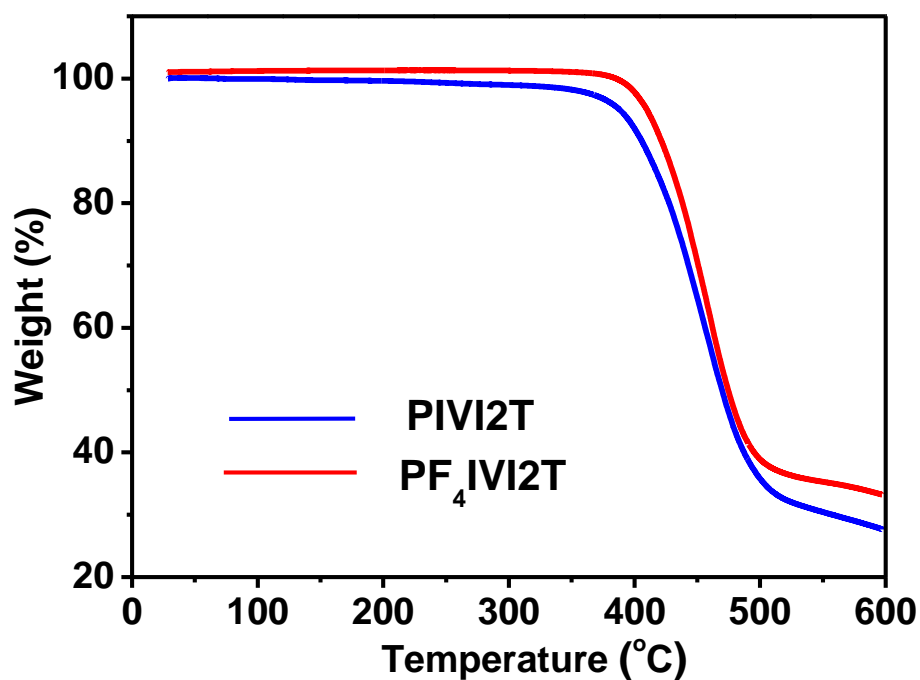

**Figure S2.** TGA plot of **PIVI2T** and **PF<sub>4</sub>IVI2T**. (scan rate: 10 °C/min)

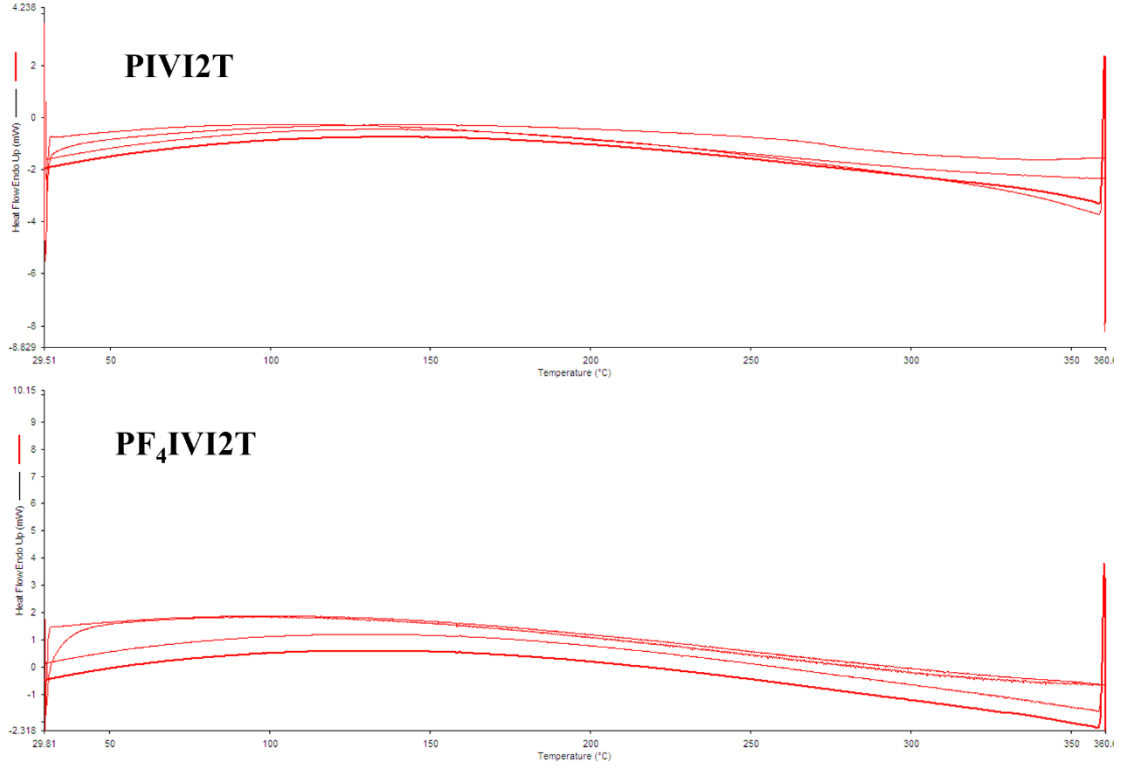

**Figure S3.** DSC curves of **PIVI2T** and **PF<sub>4</sub>IVI2T**. (scan rate: 10 °C/min)

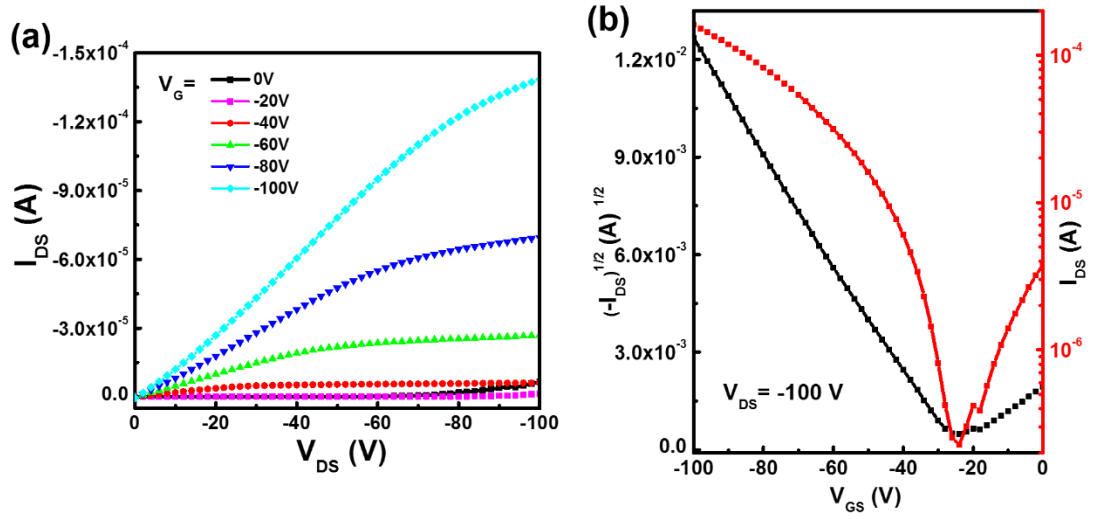

**Figure S4.** Output (a) and transfer (b) characteristics of **PIVI2T** annealed at 160 °C ( $L = 10 \text{ } \mu\text{m}$ ;  $W = 1400 \text{ } \mu\text{m}$ ).

**Table S1.** OTFT Performance of **PIVI2T** and **PF4IVI2T**.

| Polymers | $\mu_h$<br>max/avg<br>( $\text{cm}^2\text{V}^{-1}\text{s}^{-1}$ ) | $V_T$ (V) | $I_{\text{on}}/I_{\text{off}}^a$ | $\mu_h$<br>max/avg<br>( $\text{cm}^2\text{V}^{-1}\text{s}^{-1}$ ) | $V_T$ (V) | $I_{\text{on}}/I_{\text{off}}^a$ |
|----------|-------------------------------------------------------------------|-----------|----------------------------------|-------------------------------------------------------------------|-----------|----------------------------------|
| PIVI2T   | 0.32/0.26                                                         | -38~-3    | $10^3$                           | —                                                                 | —         | —                                |
| PF4IVI2T | 1.03/0.96                                                         | -37~-5    | $10^3$                           | 1.82/1.31                                                         | -5~70     | $10^3$                           |

<sup>a</sup>  $I_{\text{on}}/I_{\text{off}}$  refers to the corresponding on-to-off ratio at the maximum mobility.

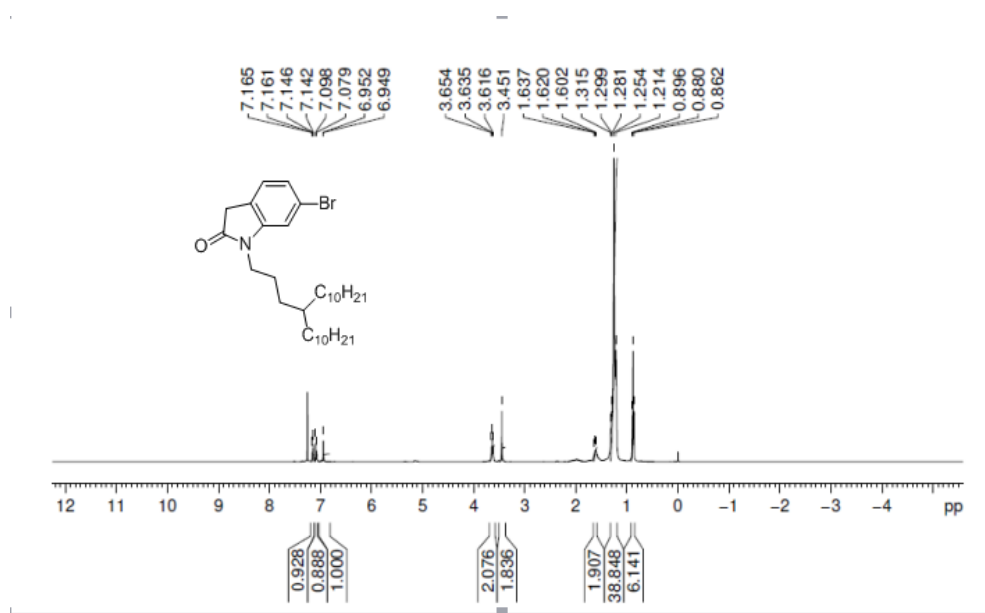**Figure S5.** <sup>1</sup>H NMR spectrum of compound **2a**.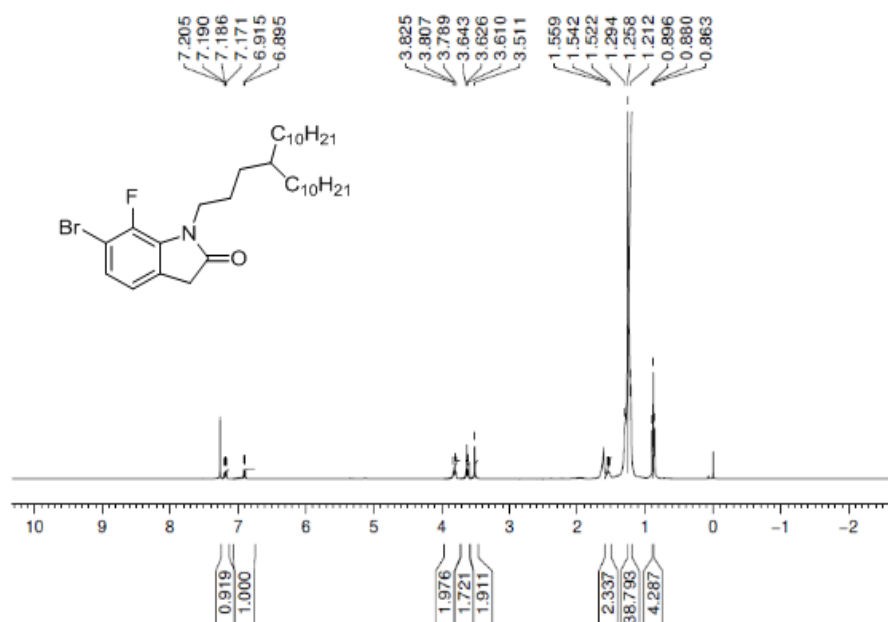**Figure S6.** <sup>1</sup>H NMR spectrum of compound **2b**.

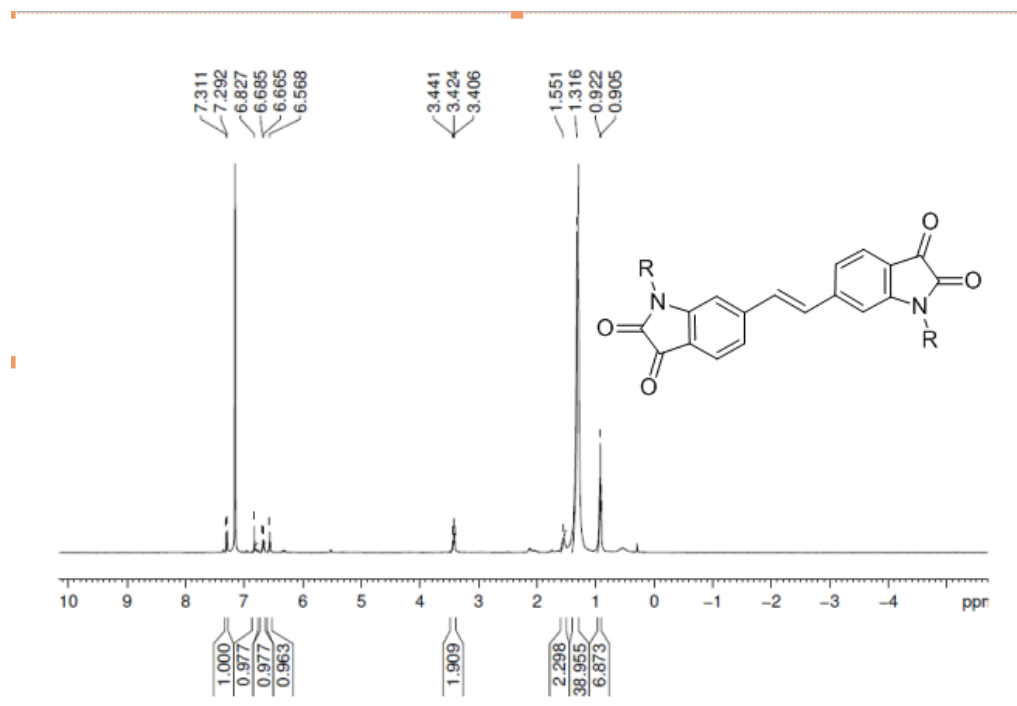

**Figure S7.** <sup>1</sup>H NMR spectrum of compound **3a**.

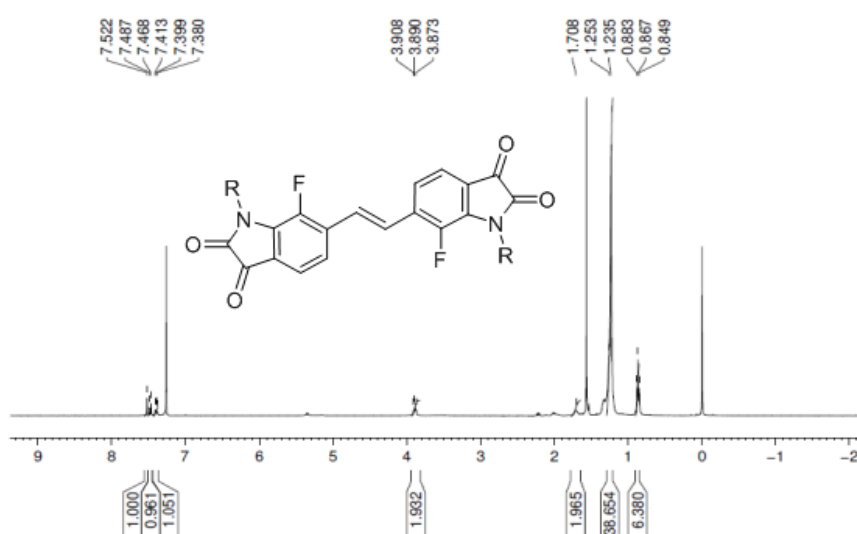

**Figure S8.** <sup>1</sup>H NMR spectrum of compound **3b**.

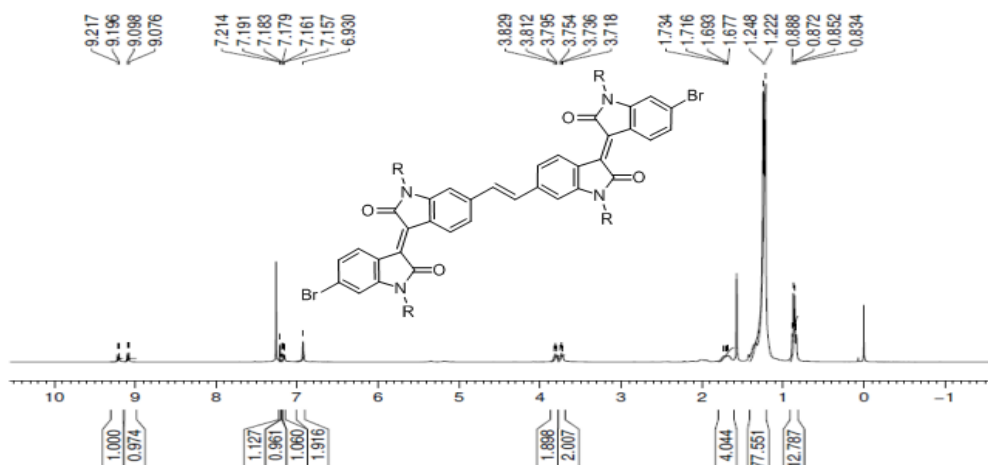

**Figure S9.**  $^1\text{H}$  NMR spectrum of compound **4a**.

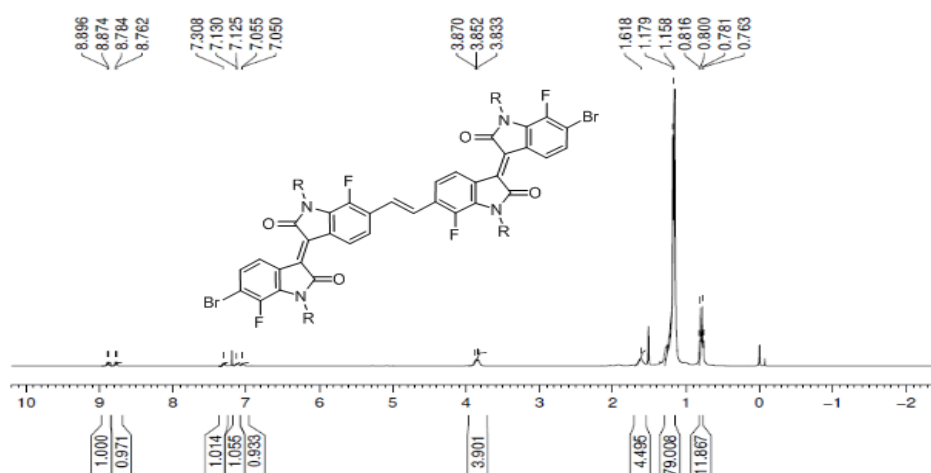

**Figure S10.**  $^1\text{H}$  NMR spectrum of compound **4b**.

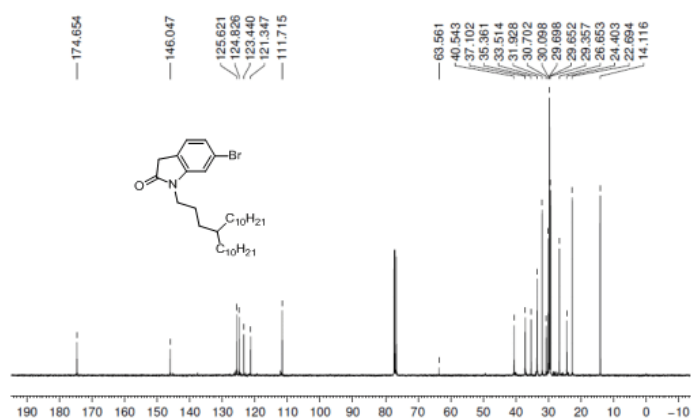

**Figure S11.**  $^{13}\text{C}$  NMR spectrum of compound **2a**.

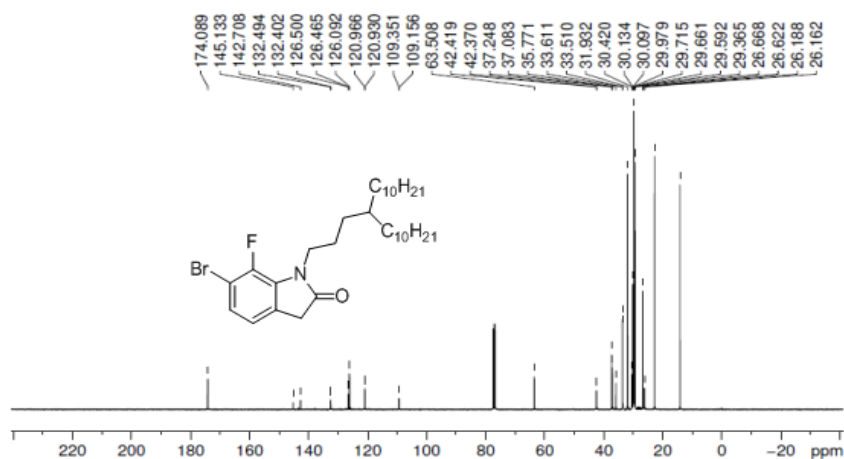

**Figure S12.** <sup>13</sup>C NMR spectrum of compound 2b.

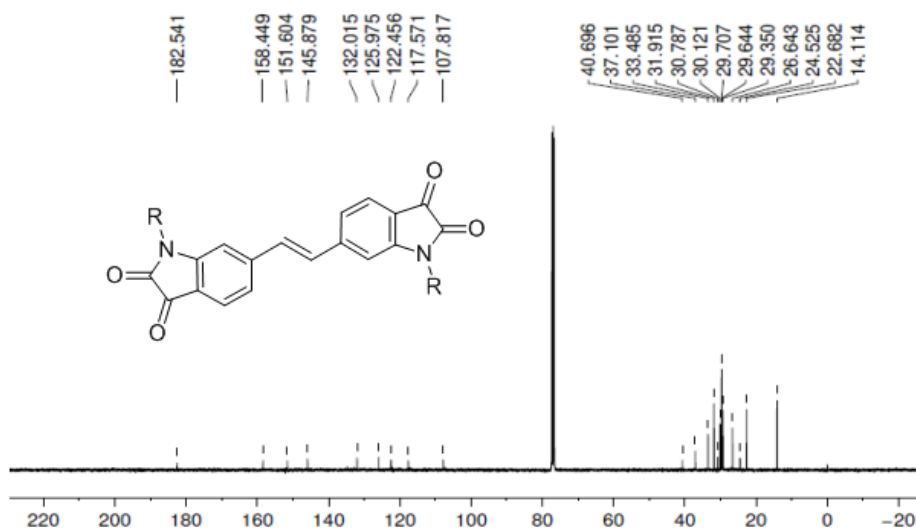

**Figure S13.** <sup>13</sup>C NMR spectrum of compound 3a.

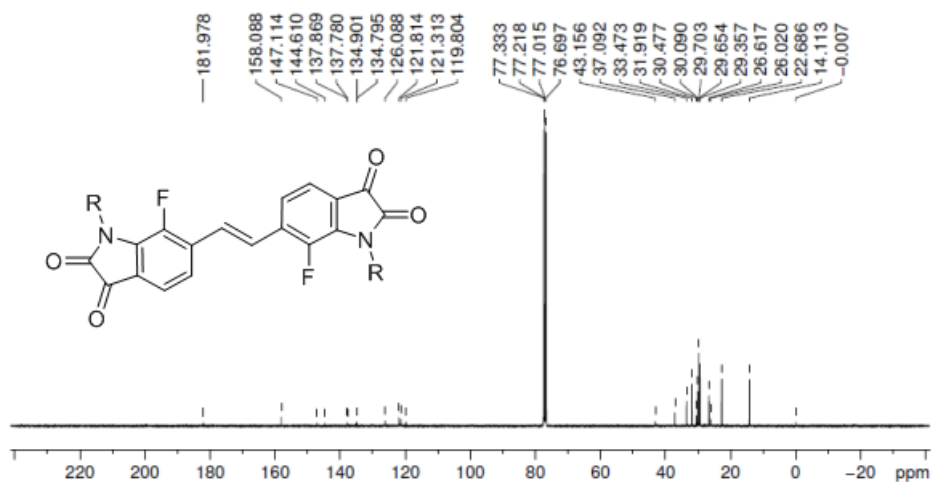

**Figure S14.**  $^{13}\text{C}$  NMR spectrum of compound **3b**.

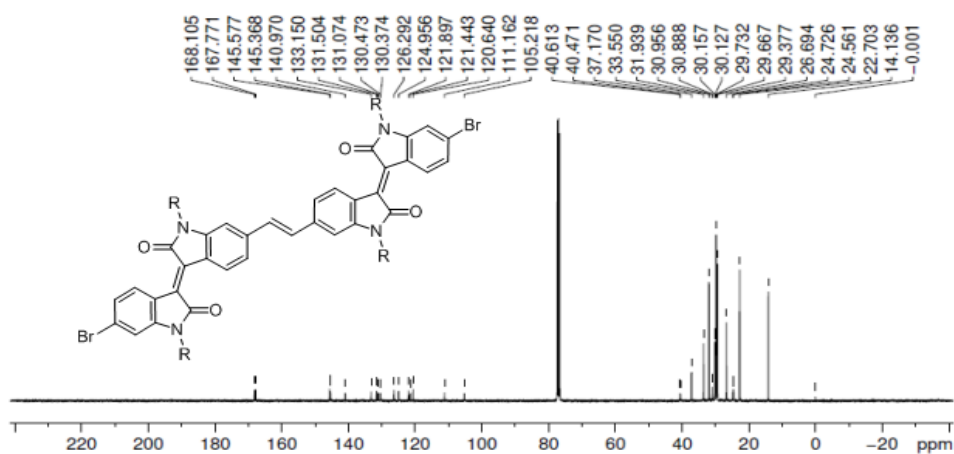

**Figure S15.**  $^{13}\text{C}$  NMR spectrum of compound **4a**.

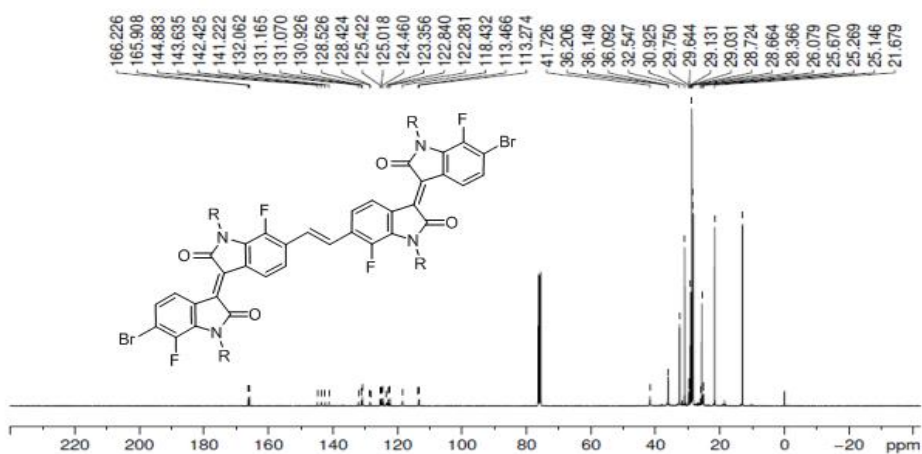

**Figure S16.**  $^{13}\text{C}$  NMR spectrum of compound **4b**.



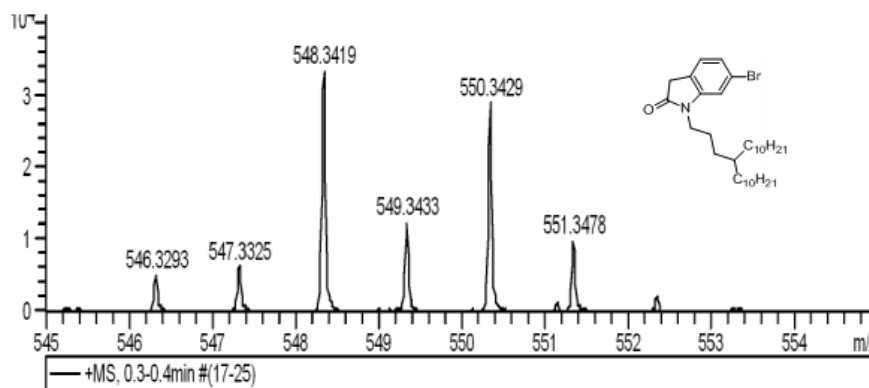

**Figure S17.** MS spectrum of compound **2a**.

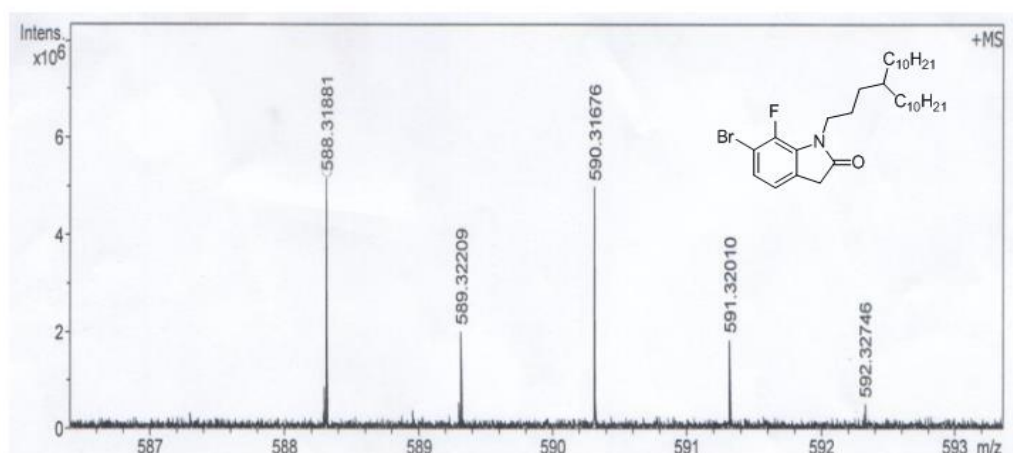

**Figure S18.** MS spectrum of compound **2b**.

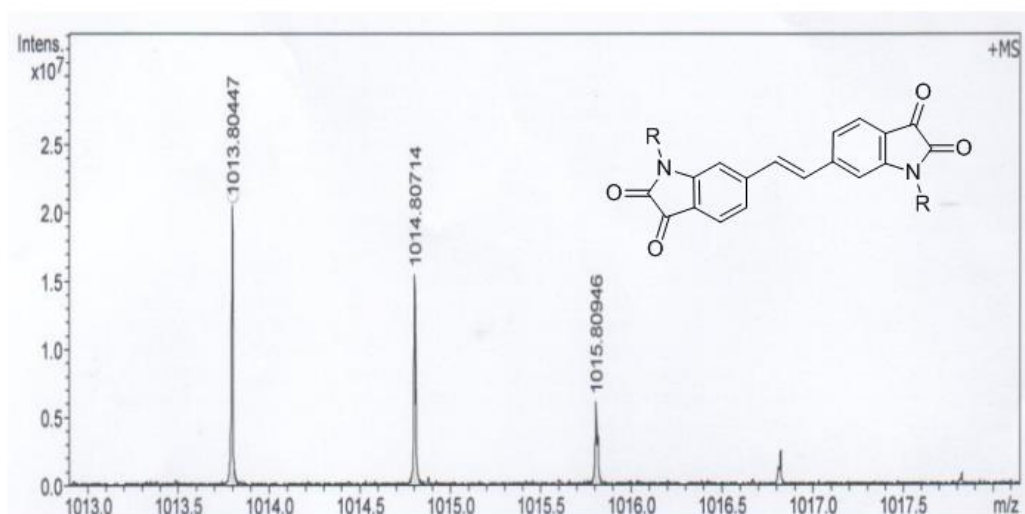

**Figure S19.** MS spectrum of compound **3a**.

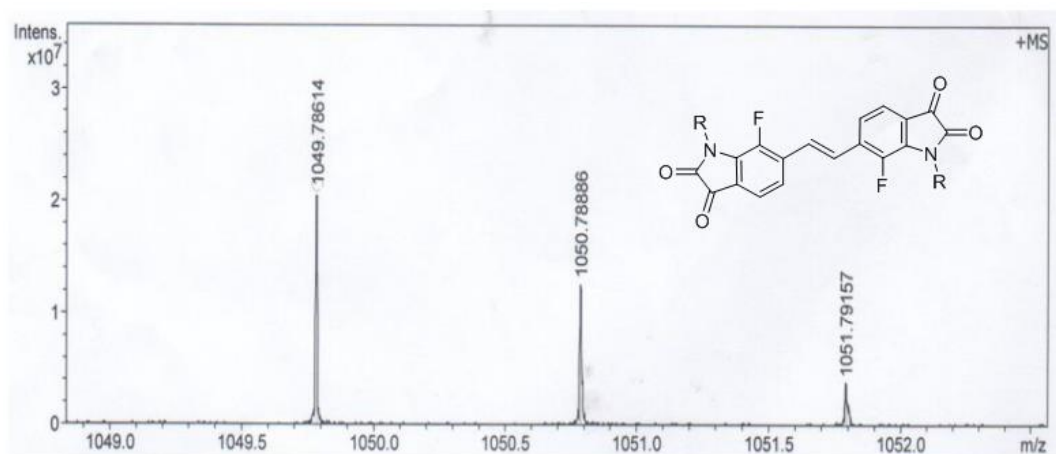

**Figure S20.** MS spectrum of compound **3b**.

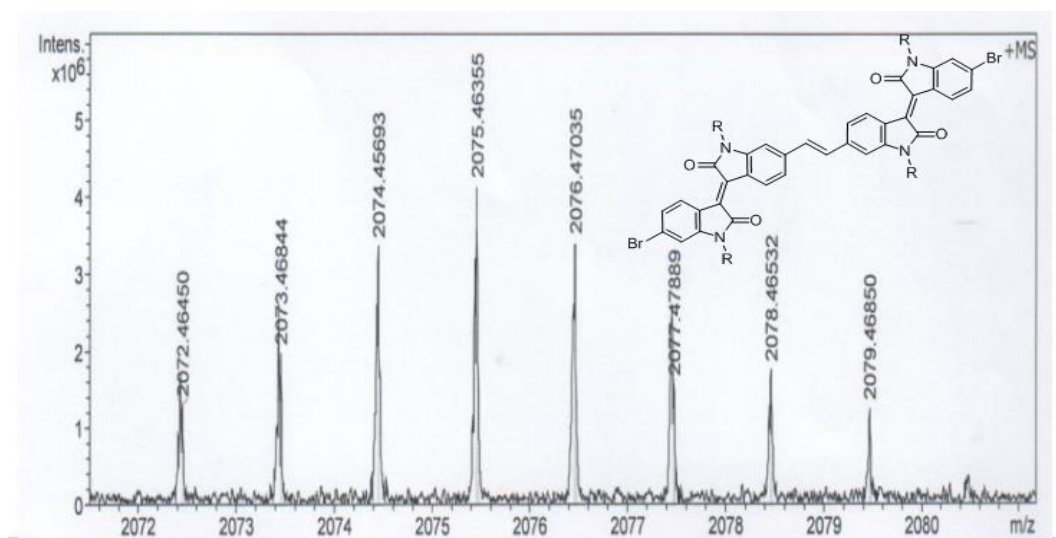

**Figure S21.** MS spectrum of compound **4a**.

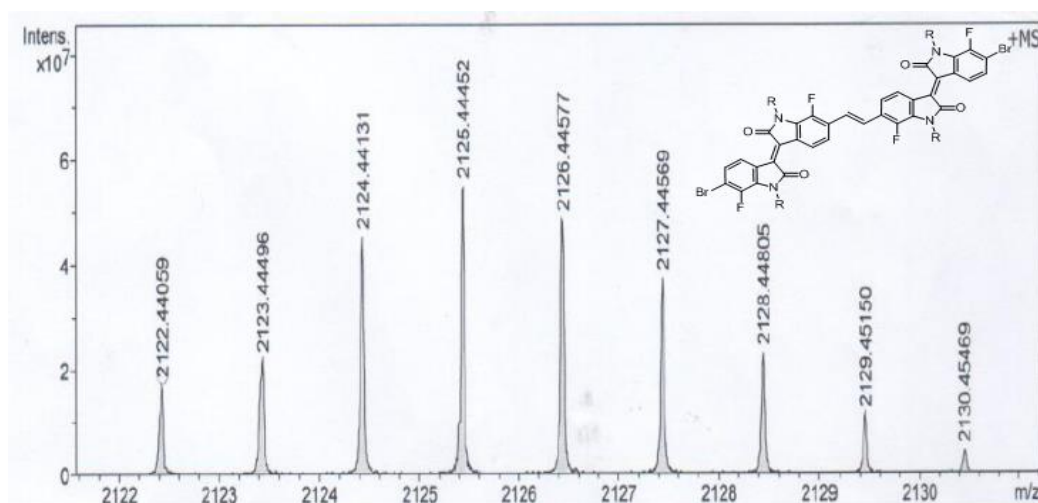

**Figure S22.** MS spectrum of compound **4b**.
